# Supplementary material for: Consumer-Involved Participatory Research to Address General Medical Health and Wellness in a Community Mental Health Setting
Source: Atypon-hosted journal article supplement (doi:10.1176/appi.ps.201500157), 2015-07-15
Supplement: appi.ps.201500157.ds001.pdf [file appi.ps.201500157.ds001.pdf]

Supplemental Table 1. Framework for addressing general medical health in community mental health settings.

| Stages of Intervention | Wellness, Engagement, and Motivation for All                                                                                                                                                                                                                                                                                                       | General Medical Health Screening                                                                                                                                                                                                                                                                                                                                                                                                                                                          | Wellness, Engagement, and Motivation for Those With Needs                                                                                                                                                                                                                                                                                                                                                  |
|------------------------|----------------------------------------------------------------------------------------------------------------------------------------------------------------------------------------------------------------------------------------------------------------------------------------------------------------------------------------------------|-------------------------------------------------------------------------------------------------------------------------------------------------------------------------------------------------------------------------------------------------------------------------------------------------------------------------------------------------------------------------------------------------------------------------------------------------------------------------------------------|------------------------------------------------------------------------------------------------------------------------------------------------------------------------------------------------------------------------------------------------------------------------------------------------------------------------------------------------------------------------------------------------------------|
| General Themes         | <ul style="list-style-type: none"> <li>• Provide total care for consumers, no barrier between general medical and mental health</li> <li>• Staff need wellness education, engagement, and motivation as well</li> <li>• Provide information in collaborative, non-judgmental, and culturally sensitive way</li> <li>• Empower consumers</li> </ul> | <ul style="list-style-type: none"> <li>• Every aspect of a consumer's life</li> <li>• Interdisciplinary collaboration</li> </ul>                                                                                                                                                                                                                                                                                                                                                          | <ul style="list-style-type: none"> <li>• Encourage consumers to be proactive in their health care</li> <li>• Use a team approach and "we" instead of "you"</li> <li>• Make improvements real and focus on small, achievable goals</li> </ul>                                                                                                                                                               |
| Methods to Incorporate | <ul style="list-style-type: none"> <li>• Wellness groups and activities (for example, nutrition and shopping classes)</li> <li>• Resource guides</li> <li>• Motivational interviewing training</li> <li>• Participation by both staff and consumers to address wellness together</li> </ul>                                                        | <ul style="list-style-type: none"> <li>• Existing tools, but without being burdensome or overwhelming to the consumer or provider</li> <li>• Ask about access to services (including vision and dental) and satisfaction with providers</li> <li>• Ask about diagnoses and treatments, including prior and family history</li> <li>• Ask about tobacco and substance use</li> <li>• Ask about lifestyle: diet, nutrition, and exercise</li> <li>• Collect vital signs and labs</li> </ul> | <ul style="list-style-type: none"> <li>• Evidence-based tools (for example, Wellness Recovery Action Plans)</li> <li>• Smoking cessation and substance use recovery groups</li> <li>• Provide basic information and brief intervention</li> <li>• Facilitate referral to primary care, substance abuse treatment, or other specialties</li> <li>• Health navigation</li> <li>• Peers as mentors</li> </ul> |
